# Supplementary material
Source: MDPI journal article supplement (https://www.mdpi.com/2673-9909/2/1/2)
Supplement: s1 [file s1]

# Supplementary Material

## MATLAB Code for Numerical Examples in Hill paper

### “On the Oval Shapes of Beach Stones”

## List of programs

1. Aristotle.m
2. New CSF Semi Implicit 6.m
3. DiscretizedStones.m
4. may2waves.m
5. PolygonSlicing3D.m
6. Numerical Solve Curve 2.m

## 1 Aristotle.m

```
%%%%%%%%%%%%%%%%%%%%%%%%%%%%%%%%%%%%%%%%%%%%%%%%%%%%%%%%%%%%%%%%%%%%%%%% Aristotle.m %%%%%%%%%%%%%%%%%%%%%%%%%%%%%%%%%%%%%%%%%%%%%%%%%%%%%%%%%%%%%%%%%%%%%%%%%

function [matrix1,matrix2] = Aristotle(gamma01,gamma02,L,M,N,Frames,fixOrigin)

% DESCRIPTION: This an implementation of curve shortening flow in the
% plane. This function only does shortening with the formula  $dh/dt = -h^2$ .

% INPUT: (gamma01,gamma02) is an inline parametric plane curve with
% period L. The approximate solution we will generate is defined on
% [0,Tmax] x [0,L]. We will use M subintervals for [0,Tmax] and N
% subintervals for [0,L].

% OUTPUT: A sequence of plots of the approximate solution curves

% "delta p"
k=L/N;

% Intialize gamma matrix: gamma1(i,j) approximates the true solution
% gamma1(ti,pj), where ti=i*h, i=0,...,M and pj=j*k, j=0,...,N, and similar
% for gamma2(i,j)
gamma1=zeros(M*15+1,N+1);
gamma2=zeros(M*15+1,N+1);

% Initial Condition
p=(0:k:L);
gamma1(1,:)=gamma01(p);
gamma2(1,:)=gamma02(p);

Tmax=.99*polyarea(gamma01(p),gamma02(p))/(2*pi);

% "delta t"
```

```

t=Tmax/(M);

polyin = polyshape(gamma1(1, 1:N),gamma2(1, 1:N));

[centerOfGravX, centerOfGravY] = centroid(polyin);

gamma1(1, :) = gamma1(1, :) - centerOfGravX;
gamma2(1, :) = gamma2(1, :) - centerOfGravY;

% Plot initial condition gamma0
plot(gamma1(1, :),gamma2(1, :));
pause(0.001)

% Setting the axis of the figure
axis([min(gamma1(1, :)) max(gamma1(1, :)) min(gamma2(1, :)) max(gamma2(1, :))])
axis equal

warningIdentifier = -1;

% switch to true for an animated graph
animated = false;

if animated
    writerObj = VideoWriter('example.avi');
    writerObj.FrameRate = 60;
    open(writerObj);

    set(gca,'nextplot','replacechildren');
    set(gcf,'Renderer','zbuffer');
else
    hold on
end

maxNorm = max(vecnorm([ gamma1(1,:); gamma2(1,:) ]));

% Explicit Scheme
for i=1:(M*15)
    polyin = polyshape(gamma1(i, 1:N),gamma2(i, 1:N));

    if warningIdentifier == -1
        [msgStr, msgId] = lastwarn;
        warningIdentifier = msgId;
        warning('off', msgId)
        warning(msgStr)
    end

    [centerOfGravX, centerOfGravY] = centroid(polyin);

    avgRad = sqrt(area(polyin)/pi);

    % shape coordinates with center of gravity at the origin
    centeredX = gamma1(i, :) - centerOfGravX;
    centeredY = gamma2(i, :) - centerOfGravY;

    norms = vecnorm([ centeredX; centeredY ]);

    % if you want to evolve according to dh/dt = -h, uncomment the two

```

```

% lines below and comment the two lines after.
% gamma1(i+1, :) = centeredX - centeredX.*min([t/(avgRad^2); 1]);
% gamma2(i+1, :) = centeredY - centeredY.*min([t/(avgRad^2); 1]);
gamma1(i+1, :) = centeredX - centeredX.*min([t*norms/(avgRad^3); ones(1, N+1)]);
gamma2(i+1, :) = centeredY - centeredY.*min([t*norms/(avgRad^3); ones(1, N+1)]);

% if we don't want it so that we fix the origin every time, move the
% shape that we found through evolution of the centered shape back to
% the original center of gravity so it's like we used distances to the
% original center of gravity instead
if ~fixOrigin
    gamma1(i+1, :) = gamma1(i+1, :) + centerOfGravX;
    gamma2(i+1, :) = gamma2(i+1, :) + centerOfGravY;
end

if animated
    if (mod(i,Frames)==0)
        %disp(max(gamma2(i+1, :))/max(gamma1(i+1, :)))
        norms = vecnorm([ gamma1(i,:); gamma2(i,:) ]);
        if max(norms) < maxNorm / 200
            disp('broke')
            break
        end
        pause(0.001)
        set(myfig,'XData', gamma1(i+1,:))
        set(myfig,'YData', gamma2(i+1,:))
        frame = getframe(gcf, [50 25 460 380]);
        writeVideo(writerObj,frame);
    end
else
    if (mod(i,Frames)==0)
        if max(norms) < maxNorm / 200
            disp('broke')
            break
        end
    end
end

%if (mod(i,4000)==0)
%if (mod(i,20000)==0)
%if i == 40000 || i == 80000 || i == 120000 || i == 160000 || i == 187500 || i == 210000
%if i == 2000 || i == 4000 || i == 7000 || i == 12000 || i == 16000
if i == 2000 || i == 4000 || i == 7000 || i == 12000 || i == 14329
%if i == 2000 || i == 4000 || i == 7000 || i == 12000 || i == 15000
%if i == 1400 || i == 2700 || i == 4500 || i == 8000 || i == 9800

%if i == 3300 || i == 6600 || i == 10000 || i == 13300 || i == 21000 || i == 42000
    disp(i)
    plot(gamma1(i+1,:), gamma2(i+1,:))
    pause(0.001)
end
end
end

if ~animated
    hold off
end
end

```

```

if warningIdentifier ~= -1
    warning('on', warningIdentifier)
end

if animated
    close(writerObj);
end

matrix1 = gamma1;
matrix2 = gamma2;

end

%%%%%%%% Examples of smooth embedded plan curves to evolve via CSF ?? %%%%%%%%%

% Unit circle:  $x^2+y^2=1$ 
% [m1, m2] = Aristotle(@cos,@sin,2*pi,20000,100,50,false);

% Ellipse:  $(x/3)^2+(y/2)^2=1$ 
% [m1, m2] = Aristotle(@(p)2*cos(p),@(p)3*sin(p),2*pi,15000,200,50,false);

% Ellipse, different form:  $x^2+(y/b)^2=1$ ,  $b = 0.9$ 
% [m1, m2] = Aristotle(@(p)0.9./((0.81*cos(p).^2 + sin(p).^2).^(1/2)).*cos(p),
    @(p)0.9./((0.81*cos(p).^2 + sin(p).^2).^(1/2)).*sin(p),2*pi,15000,200,50,false);

% Egg-shape:  $k(\cos^2(\theta) + a\cos(\theta) + b)$ ,  $b = 0.9$ 
% [m1, m2] = Aristotle(@(p)(cos(p).^2 + 1.04*cos(p) + 2.3).*cos(p), @(p)(cos(p).^2 +
    1.04*cos(p) + 2.3).*sin(p),2*pi,15000,200,50,false);

% Triangle ISOC
% [m1, m2] = Aristotle(@(p)radiusisocx(p), @(p)radiusisocy(p),2*pi,15000,200,50,false);

% Circle dent
% [m1, m2] = Aristotle(@(p)circledentx(p), @(p)sin(p),2*pi,15000,200,50,false);

% Non-embedded curve:
% [m1, m2] = Aristotle(@(p)(cos(2*p)).*cos(p)), @(p)(cos(2*p)).*sin(p)),2*pi,15000,200,50,false);

% Folium:
% [m1, m2] = Aristotle(@(p)(-(cos(p).^3).*cos(p)), @(p)(-(cos(p).^3).*sin(p)),2*pi,15000,200,50,false);
% Row 7598

% Limcon of Pascal:  $r = 3/2 + \cos(\theta)$ 
% Aristotle(@(p)((3/2 + cos(p)).*cos(p)), @(p)((3/2 + cos(p)).*sin(p)),2*pi,15000,200,50,false);

% f = @(p) Aristotle(@(p)((3/2 + cos(p)).*cos(p)), @(p)((3/2 + cos(p)).*sin(p)),2*pi,15000,200,50,false);
% timeit(f)

% Lamé curve:  $(x/3)^{1/4}+(y/4)^{1/4}=1$ 
% [m1, m2] = Aristotle(@(p)(abs(cos(p)).^(1/2) * 3 .* sign(cos(p))),
    @(p)(abs(sin(p)).^(1/2) * 4 .* sign(sin(p))),2*pi,15000,200,50,false);

% Another Lamé curve:
% [m1, m2] = Aristotle(@(p)(abs(cos(p)).^(2) * 3 .* sign(cos(p))),
    @(p)(abs(sin(p)).^(2) * 4 .* sign(sin(p))),2*pi,15000,200,50,false);

```

```

% Polygon:
% [m1, m2] = Aristotle(@(p)(cos(pi/8)./cos(p - pi/4*floor((8*p + pi)/(2*pi)))) .* cos(p)),
% @(p)(cos(pi/8)./cos(p - pi/4*floor((8*p + pi)/(2*pi)))) .* sin(p)),2*pi,15000,200,50,false);

% Non-embedded Lamé curve:
% [m1, m2] = Aristotle(@(p)(abs(cos(p)).^(4) * 3 .* sign(cos(p))),
% @(p)(abs(sin(p)).^(4) * 4 .* sign(sin(p))),2*pi,15000,200,50,false);

% Triangle SCAL
% [m1, m2] = Aristotle(@(p)trianglex(p), @(p)trianglex(p),2*pi,15000,200,50,false);

```

## 2 New\_CSF\_Semi\_Implicit\_6.m

```
%%%%%%%%%%%%%%%%%%%%%%%%%%%%%%%%%%%%%%%%%%%%%%%%%%%%%%%%%%%%%%%%%%%%%%%% New_CSF_Semi_Implicit_6.m %%%%%%%%%%%%%%%%%%%%%%%%%%%%%%%%%%%%%%%%%%%%%%%%%%%%%%%%%%%%%%%%%%%%%%%%%

function [matrix1,matrix2] = New_CSF_Semi_Implicit_6(gamma01,gamma02,L,M,N,Frames,animated,normal,
expNum,useSupport,fixOrigin)

% DESCRIPTION: This an implementation of curve shortening flow in the
% plane. We employ a semi-implicit finite difference scheme. This
% method will take a C^1, closed, embedded plane curve and deform it
% according to curve shortening flow for the life of the flow (see Tmax
% below)

% INPUT: (gamma01,gamma02) is an inline parametric plane curve with
% period L. The approximate solution we will generate is defined on
% [0,Tmax] x [0,L]. We will use M subintervals for [0,Tmax] and N
% subintervals for [0,L]. animated - determine if we want the evolution to
% be animated or not, normal - if yes, evolve based on curvature, if not,
% evolve based on h^expNum in the denominator.

% OUTPUT: A sequence of plots of the approximate solution curves

% "delta p"
k=L/N;

% Initialize gamma matrix: gamma1(i,j) approximates the true solution
% gamma1(ti,pj), where ti=i*h, i=0,...,M and pj=j*k, j=0,...,N, and similar
% for gamma2(i,j)
gamma1=zeros(M*15+1,N+1);
gamma2=zeros(M*15+1,N+1);

% Initial Condition
p=(0:k:L);
gamma1(1,:)=gamma01(p);
gamma2(1,:)=gamma02(p);

% Using polygonal Formula for Tmax
Tmax=.99*polyarea(gamma01(p),gamma02(p))/(2*pi);

% "delta t"
t=Tmax/M;

polyin = polyshape(gamma1(1, 1:N),gamma2(1, 1:N));

[centerOfGravX, centerOfGravY] = centroid(polyin);

gamma1(1, :) = gamma1(1, :) - centerOfGravX;
gamma2(1, :) = gamma2(1, :) - centerOfGravY;

% Plot initial condition gamma0
myfig=plot(gamma1(1, :),gamma2(1, :));

% Setting the axis of the figure
axis([min(gamma1(1, :)) max(gamma1(1, :)) min(gamma2(1, :)) max(gamma2(1, :))])
axis equal
pause(0.001)
```

```

warningIdentifier = -1; % boolean for making polygon warnings not print

% setup plots based on whether the graph is animated
if animated
    writerObj = VideoWriter('example.avi');
    writerObj.FrameRate = 60;
    open(writerObj);

    set(gca,'nextplot','replacechildren');
    set(gcf,'Renderer','zbuffer');
else
    hold on
end

maxNorm = max(vecnorm([ gamma1(1,:); gamma2(1,:) ]));

% Semi-Implicit Scheme
for i=1:(M*15)

    polyin = polyshape(gamma1(i, 1:N),gamma2(i, 1:N));

    % conditional statement so warnings are not always printed
    if warningIdentifier == -1
        [msgStr, msgId] = lastwarn;
        warningIdentifier = msgId;
        warning('off', msgId)
        warning(msgStr)
    end

    avgRad = sqrt(area(polyin)/pi);

    [centerOfGravX, centerOfGravY] = centroid(polyin);

    % shape coordinates with center of gravity at the origin
    centeredX = gamma1(i, :) - centerOfGravX;
    centeredY = gamma2(i, :) - centerOfGravY;

    % if we want a fixed origin, set shape to the values above
    if fixOrigin
        gamma1(i, :) = centeredX;
        gamma2(i, :) = centeredY;
    end

    % to calculate support vectors, we use values from the centered shape
    if useSupport
        norms = vecnorm([ centeredX; centeredY ]);
        unitvecs = [(centeredX./norms).', (centeredY./norms).'];
        dotproducts = unitvecs * [centeredX; centeredY];
        rad = max(dotproducts. ');
    end

    triDiagMat = zeros(N+1);

    h = zeros(N+1, 1);

    for j=2:N+1

```

```

        h(j) = norm([ (gamma1(i,j)-gamma1(i,j-1)) (gamma2(i,j)-gamma2(i,j-1)) 10^(-8)]);
    end

    h(1) = h(N+1);

    for j=1:N

        if normal
            distanceDenom = 1;
        else
            if useSupport
                distanceDenom = ((rad(j)/avgRad)^expNum);
            else
                distanceDenom = ((norm([centeredX(j) centeredY(j)])/avgRad)^expNum);
            end
        end

        prev = j-1;
        if prev == 0
            prev = N;
        end

        triDiagMat(j, prev) = -1/h(j) / distanceDenom;
        triDiagMat(j, j+1) = -1/h(j+1) / distanceDenom;
        triDiagMat(j, j) = 1/(2*t)*(h(j) + h(j+1)) + (1/h(j) + 1/h(j+1)) / distanceDenom;

    end

    triDiagMat(N+1, N) = triDiagMat(1, N);
    triDiagMat(N+1, 2) = triDiagMat(1, 2);
    triDiagMat(N+1, N+1) = triDiagMat(1, 1);

    vectorComplex = zeros(N+1, 1);

    for j=1:N

        vectorComplex(j) = 1/(2*t)*complex(gamma1(i, j), gamma2(i, j)) * (h(j) + h(j+1));

    end

    vectorComplex(N+1) = vectorComplex(1);

    newVecComplex = triDiagMat\vectorComplex;

    gamma1(i+1, :) = real(newVecComplex);
    gamma2(i+1, :) = imag(newVecComplex);

    if animated
        if (mod(i,Frames)==0)
            %disp(max(gamma2(i+1, :))/max(gamma1(i+1, :)))
            norms = vecnorm([ centeredX; centeredY ]);
            if max(norms) < maxNorm / 200
                disp('broke')
                break
            end
        end
    end

```



```

        pause(0.001)
        set(myfig,'XData', gamma1(i+1,:))
        set(myfig,'YData', gamma2(i+1,:))
        frame = getframe(gcf, [50 25 460 380]);
        writeVideo(writerObj,frame);
    end
else
    if (mod(i,Frames)==0)
        norms = vecnorm([ centeredX; centeredY ]);
        if max(norms) < maxNorm / 200
            disp('broke')
            break
        end
    end
    end
    %if (mod(i,1000)==0)

    %if i == 4650 || i == 8300 || i == 13200 || i == 20000 || i == 26000 || i == 33000
    %if i == 40000 || i == 80000 || i == 120000 || i == 160000 || i == 187500 || i == 205000
    %if i == 2000 || i == 4000 || i == 7000 || i == 12000 || i == 16000
    %if i == 2000 || i == 4000 || i == 7000 || i == 12000 || i == 15700
    %if i == 2000 || i == 4000 || i == 7000 || i == 12000 || i == 15300
    if i == 2000 || i == 4000 || i == 7000 || i == 12000 || i == 15000
    %if i == 1500 || i == 4000 || i == 7000 || i == 11000 || i == 13500 || i == 15400 || i == 16000
        disp(i)
        plot(gamma1(i+1,:), gamma2(i+1,:))
        pause(0.001)
    end
end
end
end

if ~animated
    hold off
else
    close(writerObj);
end

if warningIdentifier ~= -1
    warning('on', warningIdentifier)
end

matrix1 = gamma1;
matrix2 = gamma2;

end

%%%%%%%% Examples of smooth embedded plan curves to evolve via CSF ?? %%%%%%%%%

% Unit circle: x^2+y^2=1
% [m1, m2] = New_CSF_Semi_Implicit_6(@cos,@sin,2*pi,20000,100,50,false,false,3,false,false);

% Ellipse: (x/3)^2+(y/2)^2=1
% [m1, m2] = New_CSF_Semi_Implicit_6(@(p)2*cos(p),@(p)3*sin(p),2*pi,15000,200,50,
false,false,3,false,false);

% Ellipse, different form: x^2+(y/b)^2=1, b = 0.9
% [m1, m2] = New_CSF_Semi_Implicit_6(@(p)0.9./(0.81*cos(p).^2 + sin(p).^2).^(1/2).*cos(p),
@(p)0.9./(0.81*cos(p).^2 + sin(p).^2).^(1/2).*sin(p),2*pi,15000,200,50,false,false,3,false,false);

```

```

% Egg-shape:  $k(\cos^2(\theta) + a\cos(\theta) + b)$ ,  $b = 0.9$ 
% [m1, m2] = New_CSF_Semi_Implicit_6(@(p)(cos(p).^2 + 1.04*cos(p) + 2.3).*cos(p),
    @(p)(cos(p).^2 + 1.04*cos(p) + 2.3).*sin(p),2*pi,15000,200,50,false,false,3,false,false);

% Triangle ISOC
% [m1, m2] = New_CSF_Semi_Implicit_6(@(p)radiusisocx(p), @(p)radiusisocy(p),2*pi,15000,200,50,
    false,false,3,false,false);

% Circle dent
% [m1, m2] = New_CSF_Semi_Implicit_6(@(p)circledentx(p), @(p)sin(p),2*pi,15000,
    200,50,false,false,3,false,false);

% Non-embedded curve:
% [m1, m2] = New_CSF_Semi_Implicit_6(@(p)(cos(2*p)).*cos(p)), @(p)(cos(2*p)).*sin(p),2*pi,
    15000,200,50,false,false,3,false,false);

% Folium:
% [m1, m2] = New_CSF_Semi_Implicit_6(@(p)(-(cos(p).^3).*cos(p)), @(p)(-(cos(p).^3).*sin(p)),2*pi,
    15000,200,50,false,false,3,false,false);
% Row 7598

% Limcon of Pascal:  $r = 3/2 + \cos(\theta)$ 
% New_CSF_Semi_Implicit_6(@(p)((3/2 + cos(p)).*cos(p)), @(p)((3/2 + cos(p)).*sin(p)),2*pi,
    15000,200,50,false,false,3,false,false);

% f = @() New_CSF_Semi_Implicit_6(@(p)((3/2 + cos(p)).*cos(p)), @(p)((3/2 + cos(p)).*sin(p)),2*pi,
    15000,200,50,false,false,3,false,false);
% timeit(f)

% Lamé curve:  $(x/3)^{1/4} + (y/4)^{1/4} = 1$ 
% [m1, m2] = New_CSF_Semi_Implicit_6(@(p)(abs(cos(p)).^(1/2) * 3 .* sign(cos(p))),
    @(p)(abs(sin(p)).^(1/2) * 4 .* sign(sin(p))),2*pi,15000,200,50,false,false,3,false,false);

% Another Lamé curve:
% [m1, m2] = New_CSF_Semi_Implicit_6(@(p)(abs(cos(p)).^(2) * 3 .* sign(cos(p))),
    @(p)(abs(sin(p)).^(2) * 4 .* sign(sin(p))),2*pi,15000,200,50,false,false,3,false,false);

% Polygon:
% [m1, m2] = New_CSF_Semi_Implicit_6(@(p)(cos(pi/8)./cos(p - pi/4*floor((8*p + pi)/(2*pi))) .* cos(p)),
    @(p)(cos(pi/8)./cos(p - pi/4*floor((8*p + pi)/(2*pi))) .* sin(p)),2*pi,15000,200,50,false,
    false,3,false,false);

% Non-embedded Lamé curve:
% [m1, m2] = New_CSF_Semi_Implicit_6(@(p)(abs(cos(p)).^(4) * 3 .* sign(cos(p))),
    @(p)(abs(sin(p)).^(4) * 4 .* sign(sin(p))),2*pi,15000,200,50,false,false,3,false,false);

% Triangle SCAL
% [m1, m2] = New_CSF_Semi_Implicit_6(@(p)trianglex(p),
    @(p)triangley(p),2*pi,15000,200,50,false,false,3,false,false);

```

### 3 DiscretizedStones.m

```
function DiscretizedStones(gamma01,gamma02,L,M,N,Frames,angleChoice,probabilistic,nChoice,animated)

delta = 0.01;

% "delta p"
k=L/N;

% Initial Condition
p=(0:k:L);
gamma1=gamma01(p);
gamma2=gamma02(p);

xValues = gamma1(1, 1:N);
yValues = gamma2(1, 1:N);
polyin = polyshape(xValues,yValues);

[centerOfGravX, centerOfGravY] = centroid(polyin);
gamma1 = gamma1 - centerOfGravX;
gamma2 = gamma2 - centerOfGravY;

% Plot initial condition gamma0
myfig=plot(gamma1,gamma2);
pause(0.001)

% Setting the axis of the figure
axis([min(gamma1) max(gamma1) min(gamma2) max(gamma2)])
axis equal

set(myfig,'XData', gamma1)
set(myfig,'YData', gamma2)
pause(0.001)

% setup plots based on whether the graph is animated
if animated
    writerObj = VideoWriter('example.avi');
    writerObj.FrameRate = 60;
    open(writerObj);

    set(gca,'nextplot','replacechildren');
    set(gcf,'Renderer','zbuffer');
else
    hold on
end

maxNorm = max(vecnorm([ gamma1; gamma2]));

theta = 0;

% setup values for later calculating support function values if needed
int = 0:2*pi/200:2*pi-2*pi/200;
unitcirc = zeros(200, 2);
unitcirc(:, 1) = cos(int);
unitcirc(:, 2) = sin(int);
if strcmp(angleChoice, 'cubesupii')
    num = 2^nChoice;
```

```

int = 0:2*pi/num:2*pi-2*pi/num;
unitcirc = zeros(num, 2);
unitcirc(:, 1) = cos(int);
unitcirc(:, 2) = sin(int);
end

numFlips = 1;

tic

for i=1:M

    origArea = area(polyin);
    [centerOfGravX, centerOfGravY] = centroid(polyin);
    xValues = xValues - centerOfGravX;
    yValues = yValues - centerOfGravY;
    polyin = polyshape(xValues,yValues);

    maxX = max(xValues);
    minX = min(xValues);

    maxY = max(yValues);
    minY = min(yValues);

    disp = 0;

    if strcmp(angleChoice, 'cubesupiii') || strcmp(angleChoice, '2.5supiii')
        a = bitshift(randi([0, 2^32-1]), -5);
        b = bitshift(randi([0, 2^32-1]), -6);
        random = (a * 67108864.0 + b) / 9007199254740992.0;
        disp = random * 2 * pi;
        num = 2^nChoice;
        int = 0:2*pi/num:2*pi-2*pi/num;
        int = int + disp;
        unitcirc = zeros(num, 2);
        unitcirc(:, 1) = cos(int);
        unitcirc(:, 2) = sin(int);
    end

    if strcmp(angleChoice, 'random')
        a = bitshift(randi([0, 2^32-1]), -5);
        b = bitshift(randi([0, 2^32-1]), -6);
        random = (a * 67108864.0 + b) / 9007199254740992.0;
        theta = random * 2 * pi;
    elseif strcmp(angleChoice, 'randomii')
        theta = (randsample(2^nChoice, 1) - 1) * 2*pi/2^nChoice;
    elseif strcmp(angleChoice, 'cubesupii')
        dotproducts = unitcirc * [xValues; yValues];
        supdist = max(dotproducts. ');
        supdist = supdist.^3;
        theta = (randsample(2^nChoice, 1, true, 1./supdist)-1) * 2*pi/2^nChoice;
    elseif strcmp(angleChoice, 'cubesupiii') % uniform displacements, random drawings
        dotproducts = unitcirc * [xValues; yValues];
        supdist = max(dotproducts. ');
        supdist = supdist.^3;
        theta = (randsample(2^nChoice, 1, true, 1./supdist)-1) * 2*pi/2^nChoice+disp;
    elseif strcmp(angleChoice, '2.5supiii') % uniform displacements, random drawings

```

```

        dotproducts = unitcirc * [xValues; yValues];
        supdist = max(dotproducts. ');
        supdist = supdist.^2.5;
        theta = (randsample(2^nChoice, 1, true, 1./supdist)-1) * 2*pi/2^nChoice+disp;
    elseif strcmp(angleChoice, 'deterministic')
        theta = theta + 2 * pi / 100;
    elseif strcmp(angleChoice, 'inversesupport')
        dotproducts = unitcirc * [xValues; yValues];
        supdist = max(dotproducts. ');
        theta = randsample(200, 1, true, 1./supdist) / 100 * pi;
    elseif strcmp(angleChoice, 'cubesupport')
        dotproducts = unitcirc * [xValues; yValues];
        supdist = max(dotproducts. ');
        supdist = supdist.^3;
        theta = randsample(200, 1, true, 1./supdist) / 100 * pi;
    elseif strcmp(angleChoice, 'nonneedle')
        p1 = maxX^2 - 3*maxX + 3;
        p2 = maxY^2 - 3*maxY + 3;
        p3 = abs(minX)^2 - 3*abs(minX) + 3;
        p4 = abs(minY)^2 - 3*abs(minY) + 3;
        theta = (randsample(4, 1, true, [p1, p2, p3, p4]) - 1) * pi/2;
    elseif strcmp(angleChoice, 'a4')
        theta = (randsample(4, 1) - 1) * pi/2;
    elseif strcmp(angleChoice, 'a5')
        theta = (randsample(4, 1, true, 1./[maxX maxY abs(minX) abs(minY)]) - 1) * pi/2;
    else
        error('angleChoice must be a valid stochastic category')
    end

% calcs for reformating shape for valid area calculation in next step
direction = [cos(theta) sin(theta)];
direction_scaled = direction * norm([(maxX - minX) (maxY - minY)]);

shape = [xValues; yValues];
intersections = intersect(polyin, [[0 0]; [direction_scaled(2) -direction_scaled(1)]]);
cutPoint1 = intersections(1, :);
if isequal(cutPoint1, [0 0])
    cutPoint1 = intersections(2, :);
end
cutPoint1 = cutPoint1. ';

intersections = intersect(polyin, [[0 0]; [-direction_scaled(2) direction_scaled(1)]]);
cutPoint2 = intersections(1, :);
if isequal(cutPoint2, [0 0])
    cutPoint2 = intersections(2, :);
end
cutPoint2 = cutPoint2. ';

[~, index1] = min(vecnorm(shape - cutPoint1));
[~, index2] = min(vecnorm(shape - cutPoint2));

if index1 > index2
    xValues = [xValues(index1:numel(xValues)) xValues(1:index1-1)];
    yValues = [yValues(index1:numel(yValues)) yValues(1:index1-1)];
end

% x value of points, evaluated on the perpendicular of cut direction,

```

```

% find the max distance in that direction
dots = direction * [xValues; yValues];
xDirections = [direction(2) -direction(1)] * [xValues; yValues];
maxD = max(dots);

% determine amount of area to cut away, if probabilistic, sample from
% an exponential distribution
deltaTimesArea = delta;
if probabilistic
    deltaTimesArea = exprnd(2)*2.5*delta;
end

% iterate through all distances possible, find cuts that gives
% deltaTimesArea proportion of area cut away
for d=maxD:-maxD/10000:0

    % basically, y values are distances in theta direction away from
    % the perpendicular cut to points, combined with x values, can be
    % used to calculate area of the cut efficiently

    ys = dots - d;
    positiveYs = ys > 0;
    indices = find(positiveYs);
    if numel(indices) < 1
        continue
    end

    firstIndex = indices(1);
    lastIndex = indices(numel(indices));

    prevIndex = firstIndex - 1;

    if firstIndex == 1
        prevIndex = numel(ys);
    end

    y1 = ys(prevIndex);
    y2 = ys(firstIndex);
    x1 = xDirections(prevIndex);
    x2 = xDirections(firstIndex);
    newX1 = -y1/(y2-y1)*(x2-x1)+x1;

    forwardIndex = lastIndex + 1;

    if lastIndex == numel(ys)
        forwardIndex = 1;
    end

    y1 = ys(lastIndex);
    y2 = ys(forwardIndex);
    x1 = xDirections(lastIndex);
    x2 = xDirections(forwardIndex);
    newX2 = -y2/(y1-y2)*(x1-x2)+x2;

    xs = xDirections(positiveYs);
    xs = [newX1 xs newX2];
    ys = ys(positiveYs);

```

```

        ys = [0 ys 0];

        printArea = abs(trapz(xs, ys));

        if deltaTimesArea*origArea <= printArea
            break
        end
    end

%
%   i
%   d
%   origArea
%   printArea
%
%   if theta == 2*pi/100
%       pause(10)
%   end

% make the cut, produce new polygon
cutHere = direction * d;
intersectpolygon = [cutHere + [-direction_scaled(2) direction_scaled(1)]; ...
    cutHere + [-direction_scaled(2) direction_scaled(1)] - 2*direction_scaled; ...
    cutHere + [direction_scaled(2) -direction_scaled(1)] - 2*direction_scaled; ...
    cutHere + [direction_scaled(2) -direction_scaled(1)]];
intersectpolygon = polyshape(intersectpolygon);
polyout = intersect(polyin, intersectpolygon);

polyin = polyout;

% make counterclockwise
xValues = flip(polyin.Vertices(:, 1).');
yValues = flip(polyin.Vertices(:, 2).');

% flip again if not counterclockwise
if mod(atan2d(yValues(2), xValues(2)) - atan2d(yValues(1), xValues(1)), 360) >= 180
    xValues = flip(xValues);
    yValues = flip(yValues);
    polyin = polyshape(xValues, yValues);
    disp("found " + numFlips)
    disp(i)
    numFlips = numFlips + 1;
end

if animated
    if (mod(i, Frames)==0)
        pause(0.001)
        set(myfig, 'XData', [xValues, xValues(1)])
        set(myfig, 'YData', [yValues, yValues(1)])
        %frame = getframe;
        %frame = getframe(gcf, [74 50 435 350]);
        % axessssssss
        frame = getframe(gcf, [50 25 460 380]);
        writeVideo(writerObj, frame);
    end
else
    if (mod(i, Frames)==0)
        norms = vecnorm([ xValues; yValues ]);
    end
end

```

```

        if i == 505
            %if max(norms) < maxNorm / 200
                disp('broke')
                break
            end
        end
    end
    if (mod(i,100)==0)
        %if i == 90 || i == 200 || i == 300 || i == 450 || i == 700
            plot([xValues, xValues(1)], [yValues, yValues(1)])
            pause(0.001)
        end
    end
end

if i == 1000
    toc
end
end

% if animated or not, make final adjustments, close writer objects
if ~animated
    hold off
else
    close(writerObj);

    plot([xValues, xValues(1)], [yValues, yValues(1)]);
    pause(0.001)

    % Setting the axis of the figure
    axis([min(xValues) max(xValues) min(yValues) max(yValues)])
    axis equal
    pause(0.001)
end

beep

end

%%%%%%%% Examples of curves to evolve via Discretized Shaving of Stones %%%%%%%%%

% Unit circle:  $x^2+y^2=1$ 
% DiscretizedStones(@cos,@sin,2*pi,20000,100,5,'randomii',false,10,true);

% Ellipse:  $(x/3)^2+(y/2)^2=1$ 
% DiscretizedStones(@(p)2*cos(p),@(p)3*sin(p),2*pi,15000,200,5,'randomii',false,10,true);

% Ellipse, different form:  $x^2+(y/b)^2=1$ ,  $b = 0.9$ 
% DiscretizedStones(@(p)0.9./(0.81*cos(p).^2 + sin(p).^2).^(1/2).*cos(p),
    @(p)0.9./(0.81*cos(p).^2 + sin(p).^2).^(1/2).*sin(p),2*pi,15000,200,5,'randomii',false,10,true);

% Egg-shape:  $k(\cos^2(\theta) + a\cos(\theta) + b)$ ,  $b = 0.9$ 
% DiscretizedStones(@(p)(cos(p).^2 + 1.04*cos(p) + 2.3).*cos(p),
    @(p)(cos(p).^2 + 1.04*cos(p) + 2.3).*sin(p),2*pi,15000,200,5,'randomii',false,10,true);

% Triangle ISOC
% DiscretizedStones(@(p)radiusisocx(p), @(p)radiusisocy(p),2*pi,15000,200,5,'randomii',false,10,true);

% Circle dent

```



```

% DiscretizedStones(@(p)circledentx(p), @(p)sin(p),2*pi,15000,200,5,'randomii',false,10,true);

% Non-embedded curve:
% DiscretizedStones(@(p)(cos(2*p).*cos(p)),@(p)(cos(2*p).*sin(p)),2*pi,15000,200,5,'randomii',
false,10,true);

% Folium:
% DiscretizedStones(@(p)(-(cos(p).^3).*cos(p)),@(p)(-(cos(p).^3).*sin(p)),2*pi,15000,200,5,
'randomii',false,10,true);
% Row 7598

% Limcon of Pascal:  $r = 3/2 + \cos(\theta)$ 
% DiscretizedStones(@(p)((3/2 + cos(p)).*cos(p)),@(p)((3/2 + cos(p)).*sin(p)),2*pi,15000,200,5,
'randomii',false,10,true);

% f = @() New_CSF_Semi_Implicit_6(@(p)((3/2 + cos(p)).*cos(p)),@(p)((3/2 + cos(p)).*sin(p)),
2*pi,15000,200,5,'randomii',false,10,true);
% timeit(f)

% Lamé curve:  $(x/3)^{1/4} + (y/4)^{1/4} = 1$ 
% DiscretizedStones(@(p)(abs(cos(p)).^(1/2) * 3 .* sign(cos(p))),
@(p)(abs(sin(p)).^(1/2) * 4 .* sign(sin(p))),2*pi,15000,200,5,'randomii',false,10,true);

% Another Lamé curve:
% DiscretizedStones(@(p)(abs(cos(p)).^(2) * 3 .* sign(cos(p))),
@(p)(abs(sin(p)).^(2) * 4 .* sign(sin(p))),2*pi,15000,200,5,'randomii',false,10,true);

% Polygon:
% DiscretizedStones(@(p)(cos(pi/8)./cos(p - pi/4*floor((8*p + pi)/(2*pi))) .* cos(p)),
@(p)(cos(pi/8)./cos(p - pi/4*floor((8*p + pi)/(2*pi))) .* sin(p)),2*pi,15000,200,5,
'randomii',false,10,true);

% Non-embedded Lamé curve:
% DiscretizedStones(@(p)(abs(cos(p)).^(4) * 3 .* sign(cos(p))),
@(p)(abs(sin(p)).^(4) * 4 .* sign(sin(p))),2*pi,15000,200,5,'randomii',false,10,true);

% Triangle
% DiscretizedStones(@(p)trianglex(p), @(p)triangley(p),2*pi,15000,200,5,'randomii',false,10,true);

% Rectangle
% DiscretizedStones(@(p)rectanglex(p), @(p)rectangley(p),2*pi,15000,200,5,'randomii',false,10,true);

```

## 4 may2waves.m

```
% Jun 21st email, with Pareto magnitude waves with mean 2

T = 10;
N = 200;

period = 2*pi;

t = 0:T*period/N:T*period;
ut = rand(1, T+1);
xt = (1-ut).^(-0.5);
y = 0.5*xt(floor(t/period)+1).*(sin(t));

plot(t, y)
xlim([min(t) max(t)])
axis equal
pause(0.001)

% May 18th notes, with the sin 2*pi*t and the floors

% T = 7;
% N = 200;
%
% period = 2*pi;
%
% t = 0:T/N:T;
% ut = rand(1, T+1);
% xt = 1./(1-ut).^(1/3);
% y = xt(floor(t)+1).*(sin(t*period));
%
% plot(t, y)
% axis equal
% pause(0.001)

% Some things I tried from the April 22nd iteration, as well as the moving
% average means from my May 3rd email

% T = 3;
% N = 200;
%
% a = 1;
% b = 0.5;
%
% normals = normrnd(0,sqrt(T/N),[1,N]);
% brownian_outputs = cumsum(normals);
% brownian_outputs = [0, brownian_outputs];
% x = 0:T/N:T;
% % y = a*sin(x) + b*sin(brownian_outputs);
% % y = a*(b*sin(brownian_outputs)+1).*(sin(x));
% y = a*sin(2*pi*x) + b*cos(brownian_outputs);
% y = movmean(y, 15);
%
% plot(x, y);

% Brownian Magintudes to get waves with closer magnitudes, from my May 22nd
```

```

% email.

% T = 7;
% N = 200;
%
% period = 2*pi;
%
% t = 0:T/N:T;
% normals = normrnd(0,0.7,[1,T+1]);
% brownian_outputs = cumsum(normals);
% brownian_outputs = [0, brownian_outputs];
% xt = (1-abs(cos(brownian_outputs))) + 1.5;
% y = xt(floor(t)+1).*(sin(t*period));
%
% plot(t, y)

```

## 5 PolygonSlicing3D.m

```

function PolygonSlicing3D(rOrV,thetaOrF,phi,M,Frames,angleChoice,probabilistic,animated,polar)
delta = 0.001;
if probabilistic
    delta = delta * 2;
end
if polar
    r = rOrV;
    theta = thetaOrF;
    width = size(r,2);
    height = size(r,1);

    % all radii for first row and last row must be the same in r
    if ~all(r(1,:) == r(1, 1))
        error('all radii for the first row must be the same in r')
    end
    if ~all(r(height,:) == r(height, 1))
        error('all radii for the last row must be the same in r')
    end

    % Initial Condition
    % P = zeros(width*(height-2)+2,3);
    theta = reshape(theta,[1,width]);
    phi = reshape(phi,[height,1]);

    % P(1, :) = [0 0 r(1, 1)];
    % x = (r(2:height-1, :).sin(phi(2:height-1))).cos(theta);
    % y = (r(2:height-1, :).sin(phi(2:height-1))).sin(theta);
    % z = r(2:height-1, :).cos(phi(2:height-1));
    % P(2:width*(height-2)+1, 1) = reshape(x.',[width*(height-2), 1]);
    % P(2:width*(height-2)+1, 2) = reshape(y.',[width*(height-2), 1]);
    % P(2:width*(height-2)+1, 3) = reshape(z.',[width*(height-2), 1]);
    % P(width*(height-2)+2, :) = [0 0 -r(height, 1)];

    X = (r.*sin(phi)).cos(theta);
    Y = (r.*sin(phi)).sin(theta);
    Z = r.*cos(phi);

    X = flipud(X);
    Y = flipud(Y);
    Z = flipud(Z);

    % [V, F] = surfToMesh(P(:,1),P(:,2),P(:,3));
    [V, F] = surfToMesh(X,Y,Z);

    C = polyhedronCentroid(V, F);
    X = X - C(1);
    Y = Y - C(2);
    Z = Z - C(3);

    [V, F] = surfToMesh(X,Y,Z);
else
    V = rOrV;
    F = thetaOrF;
    C = polyhedronCentroid(V, F);

```

```

    trans = createTranslation3d(-C(1), -C(2), -C(3));

    [V, F] = transformMesh(V, F, trans);
end

drawMesh(V, F); view(3);

% Setting the axis of the figure
axis([min(V(:, 1)) max(V(:, 1)) min(V(:, 2)) max(V(:, 2)) min(V(:, 3)) max(V(:, 3))])
axis equal

pause(0.001)

origVolume = meshVolume(V, F);

% setup plots based on whether the graph is animated
if animated
    writerObj = VideoWriter('example.avi');
    writerObj.FrameRate = 40;
    open(writerObj);

    set(gca, 'nextplot', 'replacechildren');
    set(gcf, 'Renderer', 'zbuffer');
else
    hold on
end

maxNorm = max(vecnorm(V, '2'));

% CREATE 182 lines samples based on uniform spherical coordinates, for
% calculating suport values in that direction

% miniPhi = 10;
% miniWidth = 20;
%
% lessThetas = 0:2*pi/miniWidth:2*pi-2*pi/miniWidth;
% lessPhis = 0:pi/miniPhi:pi;
% lessPhis = reshape(lessPhis, [miniPhi+1, 1]);
%
% numLines = miniWidth*(miniPhi-1)+2;
%
% TestLines = zeros(numLines, 3);
%
% TestLines(1, :) = [0 0 1];
% smallX = (ones(miniPhi-1, miniWidth).*sin(lessPhis(2:miniPhi))).*cos(lessThetas);
% smallY = (ones(miniPhi-1, miniWidth).*sin(lessPhis(2:miniPhi))).*sin(lessThetas);
% smallZ = ones(miniPhi-1, miniWidth).*cos(lessPhis(2:miniPhi));
% TestLines(2:numLines-1, 1) = reshape(smallX.', [numLines-2, 1]);
% TestLines(2:numLines-1, 2) = reshape(smallY.', [numLines-2, 1]);
% TestLines(2:numLines-1, 3) = reshape(smallZ.', [numLines-2, 1]);
% TestLines(numLines, :) = [0 0 -1];

% Create 12 EQUALLY SPACED lines based on vertex positions of the
% isocahedron

numLines = 12;

```

```

TestLines = zeros(numLines, 3);
TestLines(1, :) = [0 0 1];
TestLines(2:11, 1) = cos(0:2*pi/10:2*pi-2*pi/10)*cos(atan(0.5));
TestLines(2:11, 2) = sin(0:2*pi/10:2*pi-2*pi/10)*cos(atan(0.5));
TestLines(2:2:10, 3) = sin(atan(0.5));
TestLines(3:2:11, 3) = -sin(atan(0.5));
TestLines(numLines, :) = [0 0 -1];

probabilisticCutRatios = []; % keep track of ratio of volumes cut away

warningIdentifier = -1; % boolean for making polygon warnings not print

tic

for i=1:M
    disp(origVolume)

    % translate shape back to center
    C = polyhedronCentroid(V, F);

    % conditional statement so warnings are not always printed
    if warningIdentifier == -1
        [msgStr, msgId] = lastwarn;
        warningIdentifier = msgId;
        warning('off', msgId)
        warning(msgStr)
    end

    trans = createTranslation3d(-C(1), -C(2), -C(3));
    assignin('base', 'V1', V);
    assignin('base', 'C', C);
    assignin('base', 'F', F)

    [V1, F] = transformMesh(V, F, trans);

    % perform a random 3d rotation on the 12 uniform cutting directions to
    % add a bit of randomness to which of the 12 directions (or more) we
    % pick to cut perpendicular to
    a = 2*pi*rand();
    B = 2*pi*rand();
    y = 2*pi*rand();

    yaw = [cos(a) -sin(a) 0;
           sin(a) cos(a) 0;
           0      0      1];
    pitch = [cos(B) 0 sin(B);
            0      1 0;
            -sin(B) 0 cos(B)];
    roll = [1 0 0;
           0 cos(y) -sin(y);
           0 sin(y) cos(y)];

    RotatedTestLines = yaw*pitch*roll*TestLines.';

    % If any dist is less than zero, than the above centroid calculation
    % method from the library gave us a poor result.
    % (This suggests that one of the lines never intersect the shape, and

```

```

% we cannot calculate a probability distribution from this) Thus,
% recalculate the centroid using a slower, more accurate method.
dist = max(V1 * RotatedTestLines);
if any(dist<=0)
    disp("CENTROID IS REALLY OFF. Using slower centroid calculation method.")
    k = convhulln(V);
    C = centroid(V(unique(k), :));
    trans = createTranslation3d(-C(1), -C(2), -C(3));
    assignin('base', 'V1', V);
    assignin('base', 'C', C);
    assignin('base', 'F', F)

    [V, F] = transformMesh(V, F, trans);
    dist = max(V * RotatedTestLines);
else
    V = V1;
end

assignin('base', 'RotatedTestLines', RotatedTestLines);
assignin('base', 'dist', dist);
assignin('base', 'V', V);

if strcmp(angleChoice, 'cubesup')
    lineIndex = randsample(numLines, 1, true, 1./(dist.^3));
else
    error('angleChoice must be a valid stochastic category')
end

direction = RotatedTestLines(:,lineIndex).';

% max distance associated with the chosen direction
maxD = dist(lineIndex);

if probabilistic
    while true
        % random cut from possible cuts that may cut away delta, assuming
        % convex shape (maxD-maxD*(2delta)^(1/3): maxD)
        d = rand()*maxD*(delta*2)^(1/3)*1.1 + maxD*(1-(delta*2)^(1/3)*1.1);

        plane = createPlane(d*direction, direction);
        [V1, F1] = clipConvexPolyhedronHP(V, F, plane);

        printVolume = meshVolume(V1, F1);

        cutVolume = origVolume - printVolume;

        acceptParam = exprnd(origVolume*delta);

        if acceptParam >= cutVolume
            break
        end
    end
    V = V1;
    F = F1;
    cutRatio = cutVolume/origVolume;
    probabilisticCutRatios = [probabilisticCutRatios cutRatio];
else

```

```

% determine amount of volume to cut away
deltaTimesVolume = 1-delta;

% iterate through all distances possible, find cuts that gives
% deltaTimesVolume proportion of volume cut away
for d=maxD*(1-delta):-maxD/1000:0

    plane = createPlane(d*direction, direction);
    [V, F] = clipConvexPolyhedronHP(V, F, plane);

    printVolume = meshVolume(V, F);

    if deltaTimesVolume*origVolume >= printVolume
        break
    end
end
end

% set the new original volume to be the volume of the cut
origVolume = printVolume;

if animated
    if (mod(i,Frames)==0)
        cla
        drawMesh(V, F); view(3); alpha(0.5)
        pause(0.001)
        frame = getframe(gcf, [50 25 460 380]);
        writeVideo(writerObj,frame);
    end
else
    if (mod(i,Frames)==0)
        norms = vecnorm([ xValues; yValues ]);
        if max(norms) < maxNorm / 200
            disp('broke')
            break
        end
    end
    if (mod(i,100)==0)
        drawMesh(V, F); view(3);
        pause(0.001)
    end
end

if probabilistic
    if mod(i, 100) == 0
        disp("After " + i + " iterations, the average ratio of volume cut is: "
            + mean(probabilisticCutRatios));
    end
end

if i == 1000
    beep
    toc
    disp("-----REACHED 1000 ITERATIONS-----")
    pause(2)
end
end
end

```



```

assignin('base', 'probabilisticCutRatios', probabilisticCutRatios);

% if animated or not, make final adjustments, close writer objects
if ~animated
    hold off
else
    close(writerObj);

    figure;
    drawMesh(V, F); view(3);
    axis equal
    pause(0.001)
end

if warningIdentifier ~= -1
    warning('on', warningIdentifier)
end

beep

end

%%%%%% Examples of curves to evolve via Discretized Shaving of Stones %%%%%%

% Sphere:
% N = 20;
% M = 40;
% r = ones(N+1, M); % all radii for first row and last row must be the same
% phi = 0:pi/N:pi;
% theta = 0:2*pi/M:2*pi-2*pi/M;
% PolygonSlicing3D(r,theta,phi,3000,5,'cubesup',false,true,true);

% Egg-shape:
% N = 20;
% M = 40;
% r = ones(N+1, M); % all radii for first row and last row must be the same
% phi = 0:pi/N:pi;
% theta = 0:2*pi/M:2*pi-2*pi/M;
% r = r .* reshape((cos(pi-phi).^2 + 1.04*cos(pi-phi) + 2.3),[N+1,1]);
% PolygonSlicing3D(r,theta,phi,3000,5,'cubesup',false,true,true);

% Ellipsoid:
% a = 5;
% b = 2;
% c = 9;
% N = 20;
% M = 40;
% r = ones(N+1, M); % all radii for first row and last row must be the same
% phi = 0:pi/N:pi;
% theta = 0:2*pi/M:2*pi-2*pi/M;
% denom = ones(N+1, M);
% denom1 = denom .* (reshape(cos(phi), [N+1,1]).^2 * a^2 * b^2);
% denom2 = denom .* (reshape(cos(theta), [1,M]).^2*b^2 + reshape(sin(theta), [1,M]).^2*a^2);
% denom2 = denom2 .* (reshape(sin(phi), [N+1,1]).^2 * c^2);
% denom = (denom1 + denom2).^(0.5);
% r = r * a*b*c ./denom;

```

```

% PolygonSlicing3D(r,theta,phi,3000,5,'cubesup',false,true,true);

% Tetrahedron:
% [V, ~, F] = createTetrahedron();
% V(1, :) = [-1 -2 -3];
% V(3, :) = [1.5 -7 1.2];
% PolygonSlicing3D(V,F,[],3000,5,'cubesup',false,true,false);

% Initial Shape for Sphere, Egg-Shape, Ellipsoid
% NOTE: First, run the code in the Sphere, Egg-Shape, etc. blocks,
% not including the last line that proceeds with the evolution. This
% produces the spherical coordinates of the shapes. Then, run the following
% code to produce the initial shape:
% % START
% width = size(r,2);
% height = size(r,1);
%
% % Initial Condition
% theta = reshape(theta,[1,width]);
% phi = reshape(phi,[height,1]);
%
% X = (r.*sin(phi)).*cos(theta);
% Y = (r.*sin(phi)).*sin(theta);
% Z = r.*cos(phi);
%
% X = flipud(X);
% Y = flipud(Y);
% Z = flipud(Z);
%
% [V, F] = surfToMesh(X,Y,Z);
%
% C = polyhedronCentroid(V, F);
% X = X - C(1);
% Y = Y - C(2);
% Z = Z - C(3);
%
% [V, F] = surfToMesh(X,Y,Z);
% figure;
% drawMesh(V, F); view(3);
% axis equal
% pause(0.001)

% Initial Shape for Tetrahedron
% NOTE: Run the code in the Tetrahedron block, not including the last line,
% to initialize the vertices. Then, run the following code to plot the
% initial shape:
% % START
% C = polyhedronCentroid(V, F);
%
% trans = createTranslation3d(-C(1), -C(2), -C(3));
%
% [V, F] = transformMesh(V, F, trans);
% figure;
% drawMesh(V, F); view(3);
% axis equal
% pause(0.001)

```

## 6 Numerical\_Solve\_Curve\_2.m

```
%%%%%%%%%%%%%%%%%%%%%%%%%%%%%%%%%%%%%%%%%%%%%%%%%%%%%%%%%%%%%%%%%%%%%%%% Numerical_Solve_Curve_2.m %%%%%%%%%%%%%%%%%%%%%%%%%%%%%%%%%%%%%%%%%%%%%%%%%%%%%%%%%%%%%%%%%%%%%%%%%

function [matrix1,matrix2] = Numerical_Solve_Curve_2(gamma01,gamma02,L,M,N,Frames,expNum,useSupport)

% DESCRIPTION: This an implementation of curve shortening flow in the
% plane. We employ a semi-implicit finite difference scheme. This
% method will take a  $C^1$ , closed, embedded plane curve and deform it
% according to curve shortening flow for the life of the flow (see Tmax
% below)

% INPUT: (gamma01,gamma02) is an inline parametric plane curve with
% period L. The approximate solution we will generate is defined on
% [0,Tmax] x [0,L]. We will use M subintervals for [0,Tmax] and N
% subintervals for [0,L].

% OUTPUT: A sequence of plots of the approximate solution curves

% "delta p"
k=L/N;

% Intialize gamma matrix: gamma1(i,j) approximates the true solution
% gamma1(ti,pj), where ti=i*h, i=0,...,M and pj=j*k, j=0,...,N, and similar
% for gamma2(i,j)
gamma1=zeros(M*15+1,N+1);
gamma2=zeros(M*15+1,N+1);

% Initial Condition
p=(0:k:L);
gamma1(1,:)=gamma01(p);
gamma2(1,:)=gamma02(p);

% Using polygonal Formula for Tmax
Tmax=.99*polyarea(gamma01(p),gamma02(p))/(2*pi);

% "delta t"
t=Tmax/M;

int = 0:2*pi/N:2*pi;
unitcirc = zeros(N+1, 2);
unitcirc(:, 1) = cos(int);
unitcirc(:, 2) = sin(int);

polyin = polyshape(gamma1(1, 1:N),gamma2(1, 1:N));

[centerOfGravX, centerOfGravY] = centroid(polyin);

gamma1(1, :) = gamma1(1, :) - centerOfGravX;
gamma2(1, :) = gamma2(1, :) - centerOfGravY;

avgRad = sqrt(area(polyin)/pi);

gamma1(1, :) = gamma1(1, :) / avgRad;
gamma2(1, :) = gamma2(1, :) / avgRad;
```

```

% Plot initial condition gamma0
myfig=plot(gamma1(1, :),gamma2(1, :));
pause(0.001)

% Setting the axis of the figure
axis([min(gamma1(1, :)) max(gamma1(1, :)) min(gamma2(1, :)) max(gamma2(1, :))])
axis equal

warningIdentifier = -1;
animated = true;

if animated
    writerObj = VideoWriter('example.avi');
    writerObj.FrameRate = 60;
    open(writerObj);

    set(gca,'nextplot','replacechildren');
    set(gcf,'Renderer','zbuffer');
else
    hold on
end

maxNorm = max(vecnorm([ gamma1(1,:); gamma2(1,:) ]));

% Semi-Implicit Scheme
for i=1:M*15

    polyin = polyshape(gamma1(i, 1:N),gamma2(i, 1:N));

    if warningIdentifier == -1
        [msgStr, msgId] = lastwarn;
        warningIdentifier = msgId;
        warning('off', msgId)
        warning(msgStr)
    end

    curArea = area(polyin);

    avgRad = sqrt(curArea/pi);

    [centerOfGravX, centerOfGravY] = centroid(polyin);

    gamma1(i, :) = gamma1(i, :) - centerOfGravX;
    gamma2(i, :) = gamma2(i, :) - centerOfGravY;

    gamma1(i, :) = gamma1(i, :) / avgRad;
    gamma2(i, :) = gamma2(i, :) / avgRad;

    dotproducts = unitcirc * [gamma1(i, :); gamma2(i, :)];
    rad = max(dotproducts. ');

    if i > 1
        ratio = sqrt(curArea/prevArea) / avgRad;
        if all((abs(gamma1(i, :) - ratio*gamma1(i-1, :))) < 10^-6) && all((abs(gamma2(i, :) -
            ratio*gamma2(i-1, :))) < 10^-6)
            disp("found limiting shapeeeee")
        end
    end
end

```

```

        break
    end
end

triDiagMat = zeros(N+1);

hSquared = zeros(N+1, 1);

for j=2:N+1

    hSquared(j) = (gamma1(i,j)-gamma1(i,j-1))^2 + (gamma2(i,j)-gamma2(i,j-1))^2 + 10^(-16);

end

hSquared(1) = hSquared(N+1);

for j=1:N

    if expNum == 0
        distanceDenom = 1;
    else
        if useSupport
            distanceDenom = ((rad(j)/avgRad)^expNum);
        else
            distanceDenom = ((norm([(gamma1(i, j) - centerOfGravX) (gamma2(i, j) -
            centerOfGravY)]))/avgRad)^expNum);
        end
    end

    prev = j-1;
    if prev == 0
        prev = N;
    end

    triDiagMat(j, prev) = -1 / distanceDenom;
    triDiagMat(j, j+1) = -1 / distanceDenom;
    triDiagMat(j, j) = 1/(2*t)*(hSquared(j) + hSquared(j+1)) + 2 / distanceDenom;

end

triDiagMat(N+1, N) = triDiagMat(1, N);
triDiagMat(N+1, 2) = triDiagMat(1, 2);
triDiagMat(N+1, N+1) = triDiagMat(1, 1);

vectorComplex = zeros(N+1, 1);

for j=1:N

    vectorComplex(j) = 1/(2*t)*complex(gamma1(i, j), gamma2(i, j)) * (hSquared(j) + hSquared(j+1));

end

vectorComplex(N+1) = vectorComplex(1);

newVecComplex = triDiagMat\vectorComplex;

gamma1(i+1, :) = real(newVecComplex);

```

```

gamma2(i+1, :) = imag(newVecComplex);

if (mod(i,Frames)==0)
    disp(max(gamma2(i+1, :))/max(gamma1(i+1, :)))
    pause(0.001)
    set(myfig,'XData', gamma1(i+1,:))
    set(myfig,'YData', gamma2(i+1,:))
end
prevArea = curArea;
end

matrix1 = gamma1;
matrix2 = gamma2;

end

%%%%%%%% Examples of smooth embedded plan curves to evolve via CSF ?? %%%%%%%%%

% Unit circle:  $x^2+y^2=1$ 
% [m1, m2] = Numerical_Solve_Curve_2(@cos,@sin,2*pi,20000,100,100,3,true);

% Ellipse:  $(x/3)^2+(y/2)^2=1$ 
% [m1, m2] = Numerical_Solve_Curve_2(@(p)2*cos(p),@(p)3*sin(p),2*pi,15000,200,120,3,true);

% Ellipse, different form:  $x^2+(y/b)^2=1$ ,  $b = 0.9$ 
% [m1, m2] = Numerical_Solve_Curve_2(@(p)0.9./(0.81*cos(p).^2 + sin(p).^2).^(1/2).*cos(p),
    @(p)0.9./(0.81*cos(p).^2 + sin(p).^2).^(1/2).*sin(p),2*pi,15000,200,120,3,true);
% [m1, m2] = Numerical_Solve_Curve_2(@(p)0.7./(0.49*cos(p).^2 + sin(p).^2).^(1/2).*cos(p),
    @(p)0.7./(0.49*cos(p).^2 + sin(p).^2).^(1/2).*sin(p),2*pi,15000,200,120,3,true);

% Egg-shape:  $k(\cos^2(\theta) + a\cos(\theta) + b)$ ,  $b = 0.9$ 
% [m1, m2] = Numerical_Solve_Curve_2(@(p)(cos(p).^2 + 1.04*cos(p) + 2.3).*cos(p),
    @(p)(cos(p).^2 + 1.04*cos(p) + 2.3).*sin(p),2*pi,15000,200,120,3,true);

% Triangle ISOC
% [m1, m2] = Numerical_Solve_Curve_2(@(p)radiusisocx(p), @(p)radiusisocy(p),2*pi,15000,200,120,3,true);

% Circle dent
% [m1, m2] = Numerical_Solve_Curve_2(@(p)circledentx(p), @(p)sin(p),2*pi,15000,200,50,3,true);

% Non-embedded curve:
% [m1, m2] = Numerical_Solve_Curve_2(@(p)(cos(2*p)).*cos(p)),
    @(p)(cos(2*p)).*sin(p),2*pi,15000,200,120,3,true);

% Folium:
% [m1, m2] = Numerical_Solve_Curve_2(@(p)(-(cos(p).^3).*cos(p)),
    @(p)(-(cos(p).^3).*sin(p)),2*pi,15000,200,100,3,true);
% Row 7598

% Limcon of Pascal:  $r = 3/2 + \cos(\theta)$ 
% Numerical_Solve_Curve_2(@(p)((3/2 + cos(p)).*cos(p)),
    @(p)((3/2 + cos(p)).*sin(p)),2*pi,15000,200,100,3,true);

% f = @() Numerical_Solve_Curve_2(@(p)((3/2 + cos(p)).*cos(p)),@(p)((3/2 + cos(p)).*sin(p)),2*pi,15000,200,100,3,true);
% timeit(f)

% Lamé curve:  $(x/3)^{1/4}+(y/4)^{1/4}=1$ 

```

```

% [m1, m2] = Numerical_Solve_Curve_2(@(p)(abs(cos(p)).^(1/2) * 3 .* sign(cos(p))),
@(p)(abs(sin(p)).^(1/2) * 4 .* sign(sin(p))),2*pi,15000,200,100,3,true);

% Another Lamé curve:
% [m1, m2] = Numerical_Solve_Curve_2(@(p)(abs(cos(p)).^(2) * 3 .* sign(cos(p))),
@(p)(abs(sin(p)).^(2) * 4 .* sign(sin(p))),2*pi,15000,200,100,3,true);

% Polygon:
% [m1, m2] = Numerical_Solve_Curve_2(@(p)(cos(pi/8)./cos(p - pi/4*floor((8*p + pi)/(2*pi))) .* cos(p)),
@(p)(cos(pi/8)./cos(p - pi/4*floor((8*p + pi)/(2*pi))) .* sin(p)),2*pi,15000,200,100,3,true);

% Non-embedded Lamé curve:
% [m1, m2] = Numerical_Solve_Curve_2(@(p)(abs(cos(p)).^(4) * 3 .* sign(cos(p))),
@(p)(abs(sin(p)).^(4) * 4 .* sign(sin(p))),2*pi,15000,200,100,3,true);

% Triangle ISOC (ADD SEMICOILOOOOOOONNNNNNNNNNNNNNNNN)
% [m1, m2] = Numerical_Solve_Curve_2(@(p)trianglex(p), @(p)trianglex(p),2*pi,15000,200,50,3,true);

```
